# Supplementary material for: Chemotherapy activates inflammasomes to cause inflammation-associated bone loss
Source: eLife journal article supplement (doi:10.7554/elife.92885), 2024-01-08

# 1. NLRP3

1. NLRP3

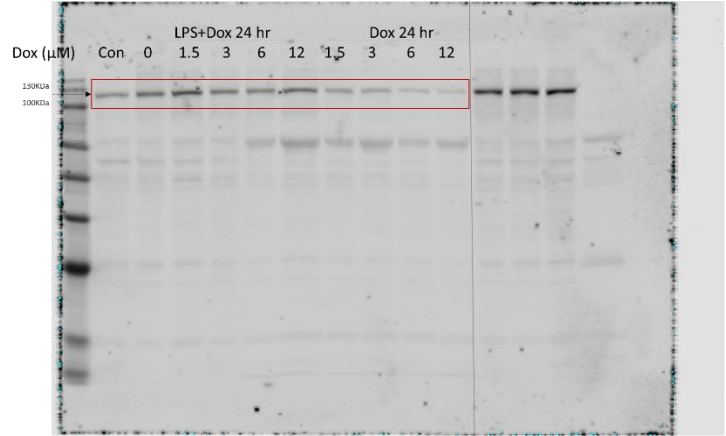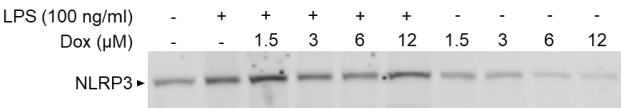

# 2. AIM2

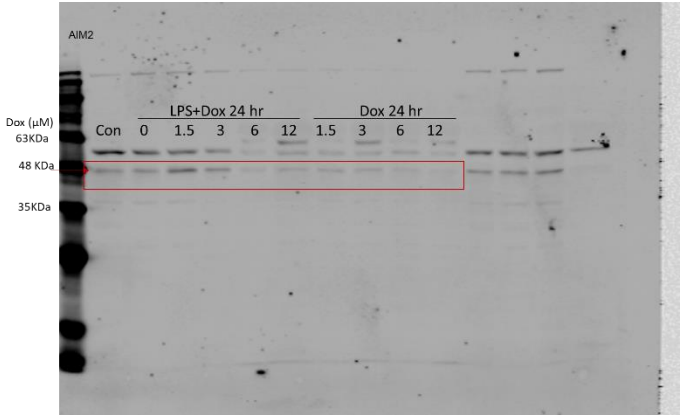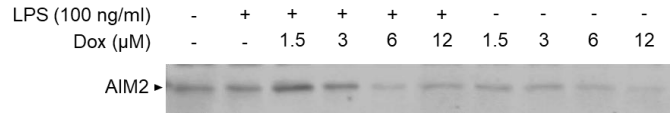

# 3. Caspase-1

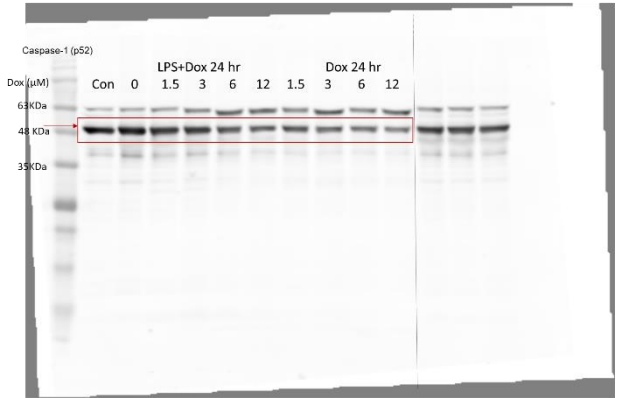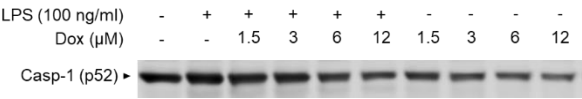

# 4. Cleaved-caspase-1 (high intensity of caspase-1 blot)

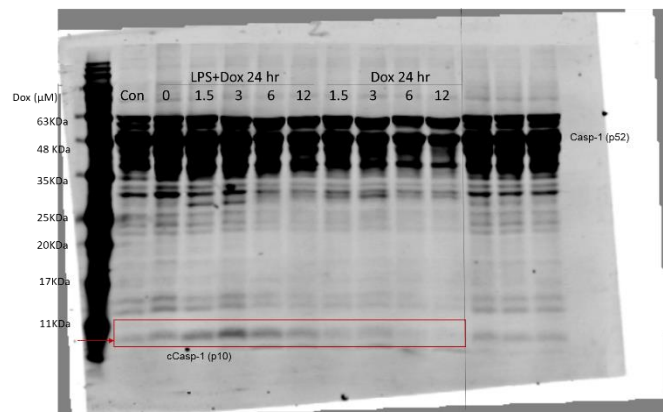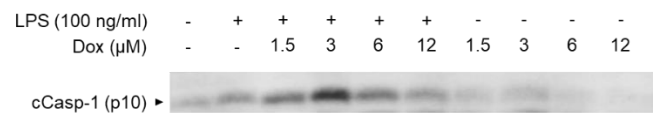

## 5. Caspase-3

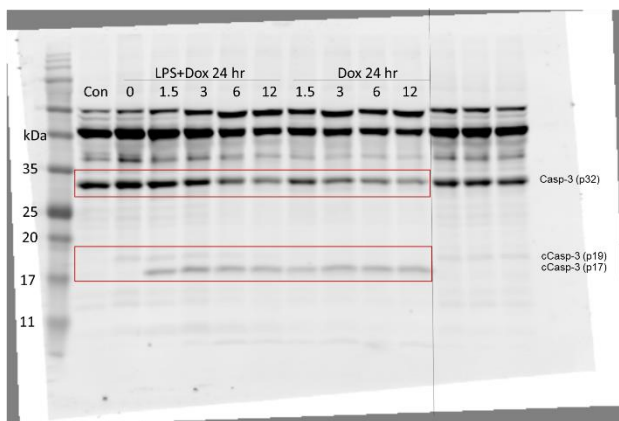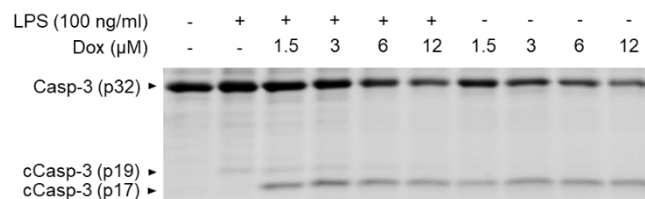

## 6. Gasdermin D (GSDMD)

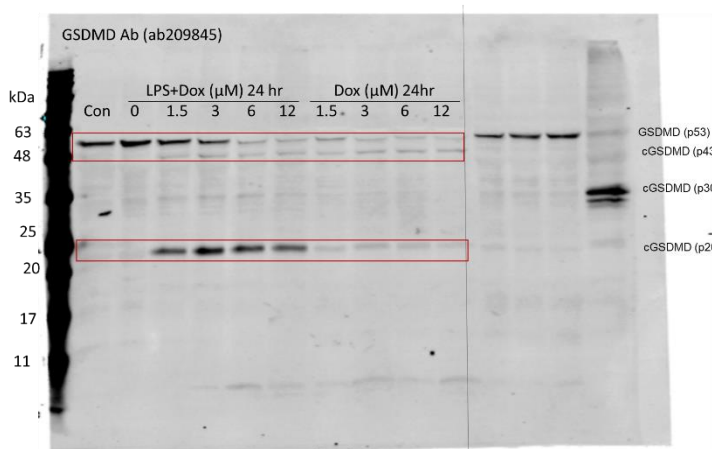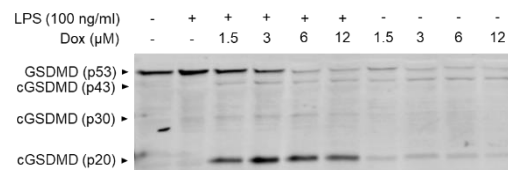

## 7. Gasdermin D (GSDMD)

GSDMD Ab: ab219800

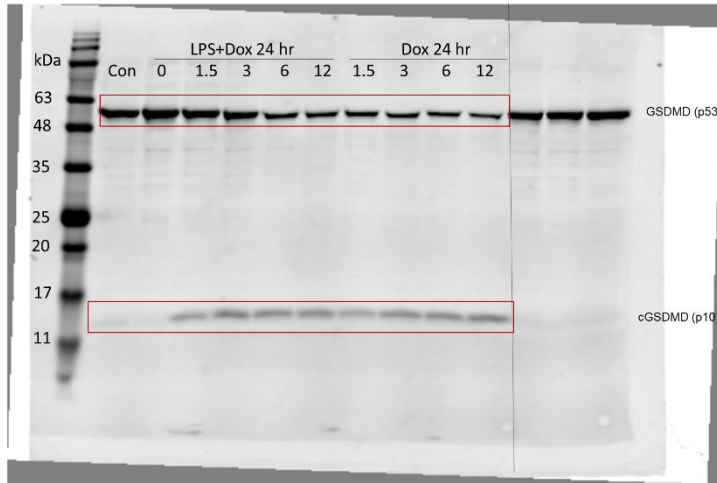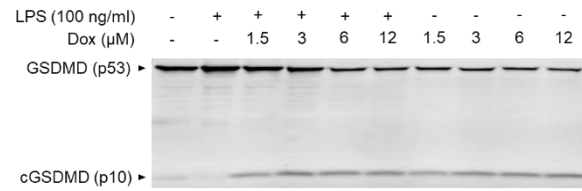

## 8. Gasdermin E (GSDME)

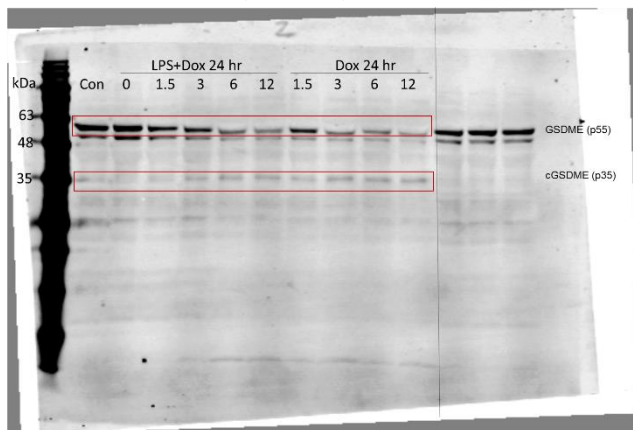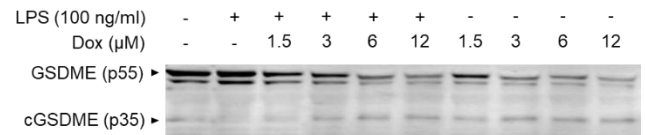

## 9. $\beta$ -actin

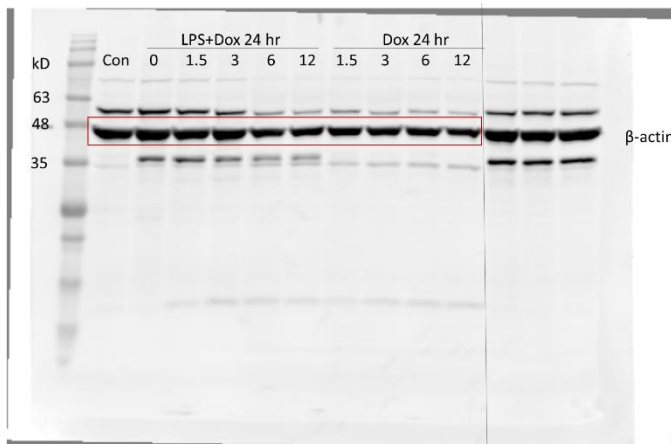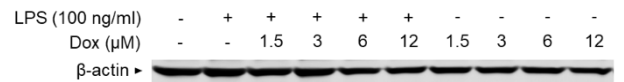

Supplement: fig4-data10 [file elife-92885-fig4-data10-v1.zip]
