# Supplementary material for: Chemotherapy activates inflammasomes to cause inflammation-associated bone loss
Source: eLife. 2024 Apr 11;13:RP92885. doi: 10.7554/eLife.92885 (PMC11008812; doi:10.7554/eLife.92885)
Supplement: Figure 1—figure supplement 1—source data 1. [file elife-92885-fig1-figsupp1-data1.xlsx]

## Sheet: Figure 1-figure supplement 1C
	BV/TV			Tb.N			Tb. Th			Tb.Sp			BMD
	Baseline	Dox		Baseline	Dox		Baseline	Dox		Baseline	Dox		Baseline	Dox
	0.1266	0.059		5.6502	3.5151		0.0443	0.054		0.1799	0.2914		173.315	100.781
	0.1149	0.0545		5.5681	3.5464		0.0418	0.0547		0.1811	0.2856		164.953	97.6802
	0.1224	0.0801		5.7258	3.7359		0.0453	0.0534		0.1753	0.2736		170.497	120.888
	0.1333	0.0705		6.4883	4.4521		0.0401	0.0412		0.1564	0.2245		194.738	111.868
	0.1252	0.047		5.6872	3.419		0.0456	0.0436		0.1787	0.3026		184.684	96.7407

## Sheet: Figure 1-figure supplement 1D
	BV/TV			Tb.N			Tb. Th			Tb.Sp			BMD
	Baseline	Vehicle		Baseline	Vehicle		Baseline	Vehicle		Baseline	Vehicle		Baseline	Vehicle
	0.3085	0.2986		7.7326	7.0572		0.0627	0.0684		0.1279	0.1458		310.586	308.801
	0.179	0.1611		6.4488	6.3953		0.0488	0.0478		0.156	0.1547		217.238	207.986
	0.2646	0.2213		7.1021	6.766		0.0638	0.0541		0.1432	0.147		281.104	254.055
	0.1854	0.2257		5.9684	6.7152		0.0547	0.0585		0.1697	0.1499		226.348	249.829
