# Supplementary material for: Chemotherapy activates inflammasomes to cause inflammation-associated bone loss
Source: eLife. 2024 Apr 11;13:RP92885. doi: 10.7554/eLife.92885 (PMC11008812; doi:10.7554/eLife.92885)
Supplement: Figure 1—figure supplement 1—source data 2. [file elife-92885-fig1-figsupp1-data2.xlsx]

## Sheet: Figure 1-figure supplement 1E
MAR	Vehicle	Dox		BFR/BS	Vehicle	Dox
	7.98518	2.86286			4.17296	0.856424
	9.63115	3.28169			5.53841	1.16901
	7.29908	4.06805			2.98853	1.4851
	3.82982	4.58131			0.926324	1.93486
	8.11286	3.47178			3.17625	1.07346
