# Supplementary material for: Chemotherapy activates inflammasomes to cause inflammation-associated bone loss
Source: eLife. 2024 Apr 11;13:RP92885. doi: 10.7554/eLife.92885 (PMC11008812; doi:10.7554/eLife.92885)
Supplement: Figure 1—source data 1. [file elife-92885-fig1-data1.xlsx]

## Sheet: Figure 1 B
	BV/TV			Tb.N			Tb.Th			Tb.Sp			BMD
	Baseline	Dox		Baseline	Dox		Baseline	Dox		Baseline	Dox		Baseline	Dox
	0.2182	0.1273		6.9474	5.0723		0.0566	0.0475		0.1444	0.2009		244.911	170.966
	0.1922	0.1414		6.6971	5.1784		0.0513	0.0493		0.1512	0.1921		227.998	179.798
	0.1669	0.0599		6.5771	3.9363		0.0468	0.0462		0.1529	0.2604		214.562	101.72
	0.1552	0.1064		6.3277	4.8332		0.0445	0.0434		0.1591	0.2082		202.724	152.081
	0.2051	0.1776		7.1205	5.5786		0.0477	0.0525		0.1379	0.1783		242.28	213.717
