# Supplementary material for: Chemotherapy activates inflammasomes to cause inflammation-associated bone loss
Source: eLife. 2024 Apr 11;13:RP92885. doi: 10.7554/eLife.92885 (PMC11008812; doi:10.7554/eLife.92885)
Supplement: Figure 1—source data 2. [file elife-92885-fig1-data2.xlsx]

## Sheet: Figure 1D &1E
Figure 1D	N.Oc/BS	Vehicle	Dox			Figure 1E	Oc.S/BS	Vehicle	Dox
		2.49444	11.235					0.033751	0.162542
		3.16105	10.7908					0.046945	0.147626
		3.7598	12.5068					0.04034	0.214789
		3.37237	9.366					0.057446	0.159543
		2.02189	13.1451					0.030395	0.177167
