# Supplementary material for: Chemotherapy activates inflammasomes to cause inflammation-associated bone loss
Source: eLife. 2024 Apr 11;13:RP92885. doi: 10.7554/eLife.92885 (PMC11008812; doi:10.7554/eLife.92885)
Supplement: Figure 2—source data 1. [file elife-92885-fig2-data1.xlsx]

## Sheet: Figure 2A
	Serum IL-1β (pg/ml)
	Vehicle	Dox
	0.79374	2.90012
	0.561309	4.29969
	0.776623	1.53576
	2.84988	5.53955
	1.45563	7.65735

## Sheet: Figure 2B
	Serum IL-18 (pg/ml)
	Vehicle	Dox
	32.602	274.996
	153.799	101.484
	12.5479	431.07
	87.354	221.809
	91.8953	361.692

## Sheet: Figure 2C
	Serum IL-6 (ng/ml)
	Vehicle	Dox
	0.197596	0.31712
	0.252112	0.338751
	0.0257811	1.0973
	0.262968	0.479667
	0.360382	1.05784

## Sheet: Figure 2D
	Serum TNF-α (pg/ml)
	Vehicle	Dox
	4.48113	34.1874
	4.72344	27.5912
	6.76017	15.7446
	16.7936	22.8158
	5.1308	15.4037

## Sheet: Figure 2F
	Serum ATP
	Vehicle	Dox
	228	4035
	244	1703
	901	2365
	412	934
	984	1098
		1601

## Sheet: Figure 2G
	Serum Cit-H3(pg/ml)
	Vehicle	Dox
	0.22476	0.48636
	0.12012	0.43404
	0.3294	0.38172
	0.22476	1.06188
	0.38172	0.53868

## Sheet: Figure 2H
	Serum MPO (ng/ml)
	Vehicle	Dox
	11.6254	43.3011
	16.6445	42.8118
	14.5424	68.5974
	14.6609	95.2214
	14.1856	51.6435

## Sheet: Figure 2I
Qubit	Serum cfDNA (ng/µl)
	Vehicle	Dox
	0.132	1.48
	0.767	4.1
	0.367	0.833
	1.37	0.993
	0.096	0.747
		3.32
		1.31
		0.667
		1.019
		4.098
		2.858
		4.944

## Sheet: Figure 2J
SYBR green	Serum cfDNA (ng/µl)
	Vehicle	Dox
	6.89569	10.4241
	5.91143	10.3188
	5.50159	9.93647
	5.60358	9.5424
		9.64333
		14.2998
		9.34136
		7.6697
