# Supplementary material for: Chemotherapy activates inflammasomes to cause inflammation-associated bone loss
Source: eLife. 2024 Apr 11;13:RP92885. doi: 10.7554/eLife.92885 (PMC11008812; doi:10.7554/eLife.92885)
Supplement: Figure 2—source data 2. [file elife-92885-fig2-data2.xlsx]

## Sheet: Figure 2E
	hrs	WBC						Neutrophils						Lymphocytes						Monocytes
	0	6.44	7.3	4.44	6.13	7.01	5.26	0.5152	0.438	0.3552	0.71	0.85	0.55	5.8604	6.716	3.9516	5.34	6.05	3.59	0.0644	0.146	0.1332	0.33	0.26	0.22
	2	4.82	3.34	3	4.1	3.71	3.28	2.7474	0.8016	1.05	2.1	1.35	1.47	2.0726	2.5384	1.95	1.96	2.31	1.75	0	0	0	0.04	0.05	0.06
	24	4.52	3.9	2.4	3.4	4.27	2.81	2.0792	1.872	1.056	1.11	2.39	1.73	2.3956	1.989	1.248	2.25	1.86	1.16	0.0452	0.039	0.048	0.04	0.02	0.08
	48	5.6	2.48	1.28	4.9	2.17	1.45	0.784	0.4712	0.3328	1.06	0.5	0.6	4.704	1.984	0.9472	3.58	1.58	0.82	0.056	0.0248	0	0.26	0.09	0.03
	72	1.88	3.42	1.92	2.19	3.1	2.2	0.47	0.5472	0.4608	0.51	0.42	0.56	1.3912	2.7702	1.4208	1.57	2.51	1.55	0.0188	0.1026	0.0384	0.11	0.17	0.09
