# Supplementary material for: Chemotherapy activates inflammasomes to cause inflammation-associated bone loss
Source: eLife. 2024 Apr 11;13:RP92885. doi: 10.7554/eLife.92885 (PMC11008812; doi:10.7554/eLife.92885)
Supplement: Figure 3—source data 1. [file elife-92885-fig3-data1.xlsx]

## Sheet: Figure 3A
IL-1β (pg/ml)	Con	LPS	Dox 1.5	Dox 3	Dox 6	Dox 12	LPS+Dox 1.5	LPS+Dox 3	LPS+Dox 6	LPS+Dox 12
	0	2.23995	0	0	0	0	145.009	260.597	330.56	272.608
	0	1.57436	0	0	0	0	159.542	279.797	334.335	265.233
	0	1.04332	0	0	0	0	123.109	240.159	280.053	252.336

## Sheet: Figure 3B
LDH (%)	Con	LPS	Dox 1.5	Dox 3	Dox 6	Dox 12	LPS+Dox 1.5	LPS+Dox 3	LPS+Dox 6	LPS+Dox 12
	2.99093	2.04996	41.1336	46.645	44.8303	42.7131	22.0791	35.4542	54.0383	62.1709
	2.62126	1.64669	38.1427	45.9393	45.1663	45.7376	20.3652	34.7149	52.6269	62.4062
	2.36158	2.68231	39.8628	44.8672	46.8569	48.6873	19.8745	33.5239	53.7625	63.8957

## Sheet: Figure 3C
ATP	Control	LPS	Dox-3	Dox-6	Dox-12 µM	LPS+Dox-3	LPS+Dox-6	LPS+Dox-12 µM
	5	6	26	29	45	51	54	60
	8	12	31	39	45	48	63	78
	7	3	23	29	40	57	62	76
