# Supplementary material for: Chemotherapy activates inflammasomes to cause inflammation-associated bone loss
Source: eLife. 2024 Apr 11;13:RP92885. doi: 10.7554/eLife.92885 (PMC11008812; doi:10.7554/eLife.92885)
Supplement: Figure 3—source data 2. [file elife-92885-fig3-data2.xlsx]

## Sheet: Figure 3H
ASC+ cells (%)	LPS	Dox	LPS+Dox	LPS+Nig
	0	0	23.5294	84
	0	0	21.875	91.3793
	0	0	20	82.1429
	0	0	17.0732	69.5652
