# Supplementary material for: Chemotherapy activates inflammasomes to cause inflammation-associated bone loss
Source: eLife. 2024 Apr 11;13:RP92885. doi: 10.7554/eLife.92885 (PMC11008812; doi:10.7554/eLife.92885)
Supplement: Figure 4—figure supplement 2—source data 1. [file elife-92885-fig4-figsupp2-data1.xlsx]

## Sheet: Figure 4-figure supplement 2
	%	Control	LPS	LPS+Dox 1.5	LPS+Dox 3	LPS+Dox 6	LPS+Dox 12	Dox 1.5	Dox 3	Dox 6	Dox 12
	cCasp-1 p10	3.54498	20.4549	31.2153	70.4276	42.2754	45.9109	13.9958	13.7388	11.6082	5.84411
	cGSDMD p30	3.17165	9.39719	17.3819	26.5436	84.8963	65.3994	18.7888	24.9191	27.4167	22.0937
	cCasp-3	0.011367	4.71193	38.1425	48.7923	45.5223	53.108	20.0175	39.3312	47.8556	60.5844
	cGSDMD p10	3.697	1.675	29.4981	42.3	53.1438	64.4275	26.1411	52.6275	54.5736	65.1616
	cGSDME p35	3.99897	3.07772	26.7906	53.9299	88.9469	95.2068	47.3322	95.4006	96.8754	95.5838
