# Supplementary material for: Chemotherapy activates inflammasomes to cause inflammation-associated bone loss
Source: eLife. 2024 Apr 11;13:RP92885. doi: 10.7554/eLife.92885 (PMC11008812; doi:10.7554/eLife.92885)
Supplement: Figure 5—figure supplement 1—source data 1. [file elife-92885-fig5-figsupp1-data1.xlsx]

## Sheet: Sheet1
		%	Control	LPS	LPS+Dox	Dox
		cCasp-1 p10	0.74809	12.923	4.91624	4.72926
		cGSDMD p30	31.959	44.8097	47.2433	42.8778
		cCasp-3	21.7494	18.8415	98.7364	90.5918
		cGSDMD p10	19.5853	19.8178	90.1347	85.3895
		cGSDME p35	231.858	182.378	220.211	208.612
