# Supplementary material for: Chemotherapy activates inflammasomes to cause inflammation-associated bone loss
Source: eLife. 2024 Apr 11;13:RP92885. doi: 10.7554/eLife.92885 (PMC11008812; doi:10.7554/eLife.92885)
Supplement: Figure 5—source data 8. [file elife-92885-fig5-data8.xlsx]

## Sheet: Figure 5B
IL-1β (pg/ml)	Con	LPS	Dox 5	Dox 10	LPS+Dox 5	LPS+Dox 10
	0	82.8402	43.2677	51.028	210.396	277.212
	0	81.1058	38.4237	60.3401	207.783	301.68
	0	80.6728	32.2739	43.6179	176.684	260.186

## Sheet: Fifure 5C
LDH (%)	Con	LPS	Dox 5	Dox 10	LPS+Dox 5	LPS+Dox 10
	54.4382	34.1673	70.8733	72.2948	64	62.757
	55.2032	36.6534	68.7928	71.4565	66.1036	59.6972
	56.3912	37.8724	66.6852	74.2163	65.7211	68.2072
