# Supplementary material for: Chemotherapy activates inflammasomes to cause inflammation-associated bone loss
Source: eLife. 2024 Apr 11;13:RP92885. doi: 10.7554/eLife.92885 (PMC11008812; doi:10.7554/eLife.92885)
Supplement: Figure 6—source data 1. [file elife-92885-fig6-data1.xlsx]

## Sheet: Figure 6B
cfDNA (ng/ml)	Control	LPS	Dox	LPS+Dox
	10.4	9.3	21	24.1
	9.3	7.2	20.9	19.7
	8	8.5	23.3	18.6

## Sheet: Figure 6C
IL-1β (pg/ml)	Control	LPS	DNaseI 1μg/mL	DNaseI 10μg/mL	LPS+DNaseI 1μg/mL	LPS+DNaseI 10μg/mL	LPS+Dox	LPS+DNase1μg/mL+Dox	LPS+DNase10μg/mL+Dox
	224.588	88.1176	186.353	72.8235	197.529	80.4706	229.882	92.8235	71.6471
	164.588	171.647	90.4706	106.941	91.6471	87.5294	308.118	109.882	84.5882
	104.588	190.471	87.5294	144	88.7059	144.588	327.529	108.706	42.2353
