# Supplementary material for: Chemotherapy activates inflammasomes to cause inflammation-associated bone loss
Source: eLife. 2024 Apr 11;13:RP92885. doi: 10.7554/eLife.92885 (PMC11008812; doi:10.7554/eLife.92885)
Supplement: Figure 7—figure supplement 2—source data 1. [file elife-92885-fig7-figsupp2-data1.xlsx]

## Sheet: Figure7-figure supplement 2B
	BV/TV change (%)
	WT	Aim2-/-	Nlrp3-/-	Aim2-/-;Nlrp3-/-	Casp1-/-
	-50.3207	-39.305	-8.0148	-42.7737	-21.9331
	-66.8896	-49.9093	-51.2821	-44.5043	-12.5265
	-64.0714	-36.0743	-38.5949	-46.0072	-16.7868
	-67.8388	-47.8203	-44.0939	-28.9843	-16.6348
	-62.4601	-41.7722	-49.7982	-21.7568	-17.4719
				-20.1477
				-39.8775

## Sheet: Figure 7-figure supplement 2C
	BMD change (%)
	WT	Aim2-/-	Nlrp3-/-	Aim2-/-;Nlrp3-/-	Casp1-/-
	-36.259	-25.115	-18.203	-29.938	-10.016
	-39.779	-38.115	-42.831	-34.143	-6.793
	-49.084	-23.534	-32.213	-29.427	-18.51
	-51.822	-34.671	-36.393	-26.009	-6.299
	-47.618	-28.557	-34.878	-14.822	-13.66
				-19.836
				-28.088

## Sheet: Figure 7-figure supplement 2D
	Tb.N
	Baseline										Dox
	WT	5.8185	5.0733	5.2385	5.2367	5.6872					3.91	3.3103	3.592	3.5626	3.419
	Aim2-/-	6.3118	7.3208	5.9026	6.3714	6.4006					4.3504	4.8079	4.4394	4.0003	4.7056
	Nlrp3-/-	4.8978	5.1179	5.2666	6.6966	5.082					4.0381	3.6577	3.823	4.0345	3.5454
	Aim2-/-;Nlrp3-/-	6.2111	7.2857	6.4295	5.4719	7.9677	6.6711	7.8929			4.5558	4.5718	3.9516	4.1887	5.7286	5.2376	5.0667
	Casp1-/-	5.6238	4.8652	4.8936	5.4325	5.9558					4.2232	4.0858	4.2832	4.0661	4.4523
	Tb.Th
	Baseline										Dox
	WT	0.0454	0.0543	0.0503	0.0503	0.0456					0.048	0.0494	0.0477	0.0487	0.0436
	Aim2-/-	0.046	0.0471	0.0418	0.0443	0.0466					0.0494	0.0471	0.0469	0.0435	0.0493
	Nlrp3-/-	0.0366	0.0491	0.0448	0.0418	0.0465					0.0408	0.0434	0.0419	0.0486	0.0496
	Aim2-/-;Nlrp3-/-	0.0411	0.0489	0.0481	0.0491	0.0516	0.0478	0.0535			0.0405	0.056	0.0549	0.0534	0.0558	0.053	0.0546
	Casp1-/-	0.0403	0.0436	0.0442	0.0418	0.0446					0.0553	0.0498	0.0452	0.0537	0.0559
	Tb.Sp
	Baseline										Dox
	WT	0.1748	0.2035	0.197	0.1943	0.1787					0.2615	0.3091	0.2859	0.2894	0.3026
	Aim2-/-	0.1595	0.1378	0.1714	0.1586	0.155					0.2348	0.2115	0.2323	0.2545	0.2199
	Nlrp3-/-	0.2086	0.203	0.1964	0.153	0.1996					0.2608	0.2965	0.2711	0.2736	0.2943
	Aim2-/-;Nlrp3-/-	0.1642	0.1447	0.1595	0.1852	0.1308	0.1515	0.129			0.2234	0.2241	0.2643	0.2456	0.1829	0.1968	0.2076
	Casp1-/-	0.1833	0.21	0.2064	0.1855	0.1697					0.2481	0.254	0.2367	0.2534	0.2363
