# Supplementary material for: Chemotherapy activates inflammasomes to cause inflammation-associated bone loss
Source: eLife. 2024 Apr 11;13:RP92885. doi: 10.7554/eLife.92885 (PMC11008812; doi:10.7554/eLife.92885)
Supplement: Figure 7—source data 1. [file elife-92885-fig7-data1.xlsx]

## Sheet: Figure 7A
IL-1β (pg/ml)		WT			Aim2-/-			Nlrp3-/-			Aim2-/-;Nlrp3-/-			Casp1-/-
	Con	4.54912	6.3534	9.0229	3.54492	0	5.18037	5.45466	2.86268	1.91971	0.408369	0.582088	0.408369	2.54856	0.487944	5.22355
	LPS	6.80074	8.87535	5.78261	7.04097	6.29915	4.59732	6.05446	5.30426	5.63825	0.32777	0.408369	0.367505	4.98365	4.86352	5.13429
	L+Dox 10 uM	131.325	108.159	112.15	72.3812	68.9038	75.7597	54.3986	61.7852	53.4281	65.609	48.5466	57.5489	51.2411	52.3205	46.5795

## Sheet: Figure 7B
LDH (%)		WT			Aim2-/-			Nlrp3-/-			Aim2-/-;Nlrp3-/-			Casp1-/-
	Con	0.775363	0.024988	0.100025	0	0	0	0	0	0	2.65566	2.31744	1.94164	0	0.442013	0.321459
	LPS	0.850401	0.100025	0	0	0	0	0	0	0	1.15246	0.701503	0.701503	0	0	0.261181
	L+Dox 10 uM	50.9004	45.0475	45.7979	35.2339	32.9783	33.8554	35.0811	36.0549	35.98	33.4878	33.2624	30.3311	29.797	32.6904	32.2684

## Sheet: Figure 7C
IL-1β (pg/ml)		WT			Aim2-/-			Nlrp3-/-			Aim2-/-;Nlrp3-/-			Casp1-/-
	Con	1.00585	0.847428	0	0.137706	0	1.15095	0	0	0	0.532	0	0.0924592	0.138947	0.138947	0.089028
	LPS	19.316	18.8666	18.508	8.76235	9.01225	8.67915	7.7876	7.63135	7.63135	9.01103	9.29786	8.96394	4.01145	3.22188	3.69479
	L+Dox 10 uM	39.3653	35.0652	33.8837	15.7453	15.4842	17.233	20.8669	21.7234	21.9813	19.8382	19.4099	18.3513	19.7235	18.9867	19.1091

## Sheet: Figure 7D
LDH (%)		WT			Aim2-/-			Nlrp3-/-			Aim2-/-;Nlrp3-/-			Casp1-/-
	Con	86.8063	82.4387	87.8982	71.223	71.223	70.4136	82.6272	71.695	76.017	71.9127	71.0282	74.0133	82.3256	80.9303	88.6047
	LPS	58.6898	51.8654	61.9655	59.0827	55.0359	59.892	59.4916	58.7289	55.9323	58.2034	58.7562	50.6357	65.2326	61.9186	56.6861
	L+Dox 10 uM	102.093	101.547	94.4496	83.633	86.3309	97.6618	86.4407	91.017	90.2543	85.7435	91.874	87.0702	95.0582	90.1745	89.6512
