# Supplementary material for: Chemotherapy activates inflammasomes to cause inflammation-associated bone loss
Source: eLife. 2024 Apr 11;13:RP92885. doi: 10.7554/eLife.92885 (PMC11008812; doi:10.7554/eLife.92885)
Supplement: Figure 7—source data 2. [file elife-92885-fig7-data2.xlsx]

## Sheet: Figure 7F
	BV/TV change (%)
	WT	Aim2-/-	Nlrp3-/-	Aim2-/-;Nlrp3-/-	Casp1-/-
	-47.4083	-14.3964	-50.0778	-49.6711	-9.2284
	-58.5915	-23.159	-52.9263	-25.3885	-10.1535
	-76.1748	-34.6618	-53.7496	-12.4738	-28.676
	-50.1971	-19.4301	-42.719	-23.4043	-2.25056
	-64.1102	-45.0541	-63.1296	-18.3018	-18.2903
			-34.4116	-37.6566	-31.2693
				-29.9698
				-12.6432

## Sheet: Figure 7G
	BMD change (%)
	WT	Aim2-/-	Nlrp3-/-	Aim2-/-;Nlrp3-/-	Casp1-/-
	-33.095	-10.891	-33.102	-35.734	-3.665
	-41.385	-19.844	-33.106	-17.589	-3.594
	-56.419	-25.974	-35.881	-6.286	-22.331
	-33.202	-12.139	-27.291	-16.548	-6.113
	-52.592	-32.329	-47.278	-10.803	-12.221
			-24.229	-26.771	-16.189
				-21.489
				-7.445
