# Supplementary material for: Chemotherapy activates inflammasomes to cause inflammation-associated bone loss
Source: eLife. 2024 Apr 11;13:RP92885. doi: 10.7554/eLife.92885 (PMC11008812; doi:10.7554/eLife.92885)
Supplement: Figure 7—source data 3. [file elife-92885-fig7-data3.xlsx]

## Sheet: Figure 7H&7I
Figure 7H	N.Oc/BS		Control					Dox
		Wild type	2.10078	1.10087	2.50461	2.13326	2.98397	8.91663	8.56413	9.92605	12.7688	10.4327
		Aim2-/-	2.49987	3.03823	2.41248	2.24657	2.05469	4.11775	5.98	8.12001	3.20633	4.04322
		Nlrp3-/-	3.60018	2.5028	1.92623	2.50698	2.89941	8.46055	2.75401	2.95336	6.45946	7.6265
		Aim2-/;Nlrp3-/-	1.80607	2.17467	1.63189	3.44779	3.74192	5.35059	5.46372	3.41622	5.36448	6.14493
		Casp1-/-	2.35184	2.64997	2.20122	2.71677	1.74367	4.0327	6.06307	4.49778	5.0036	4.43269
Figure 7I	Oc.S/BS		Control					Dox
		Wild type	0.028529	0.01088	0.035193	0.027767	0.059051	0.102142	0.092769	0.134975	0.168938	0.144924
		Aim2-/-	0.047392	0.045215	0.0343	0.027866	0.039819	0.061009	0.087039	0.096455	0.048635	0.091432
		Nlrp3-/-	0.06044	0.049391	0.019749	0.026889	0.042148	0.100934	0.031948	0.103867	0.091432	0.110412
		Aim2-/;Nlrp3-/-	0.031267	0.033022	0.040264	0.023964	0.055467	0.079727	0.079755	0.04785	0.067724	0.089994
		Casp1-/-	0.036474	0.032304	0.025077	0.04546	0.020986	0.062931	0.094525	0.077362	0.057323	0.059292
