# Supplementary figures and images for: Chemotherapy activates inflammasomes to cause inflammation-associated bone loss
Source: eLife journal article supplement (doi:10.7554/elife.92885), 2024-01-08

## 1. NLRP3

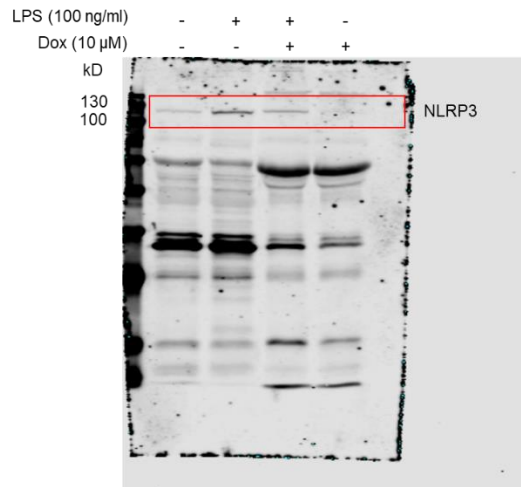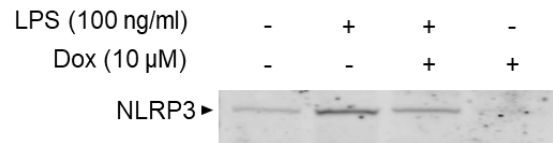

## 2. Caspase-1

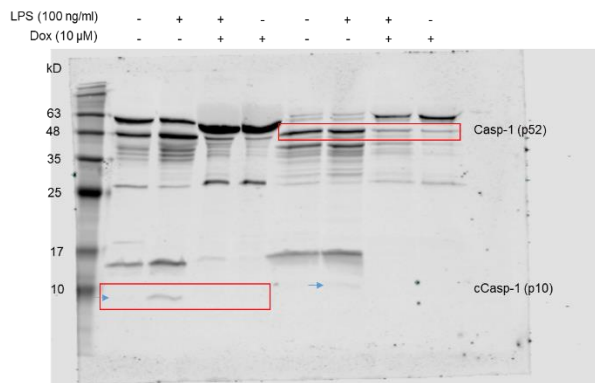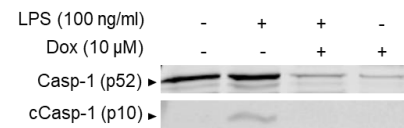

## 3. Gasdermin D (GSDMD)

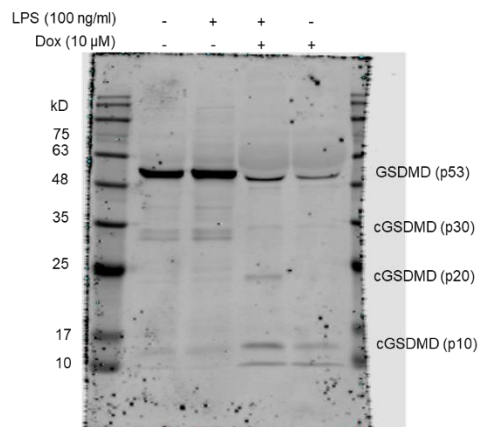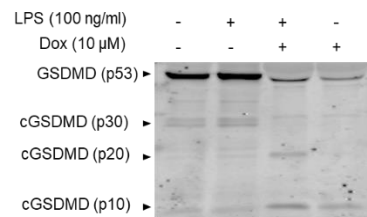

## 4. Gasdermin E (GSDME)

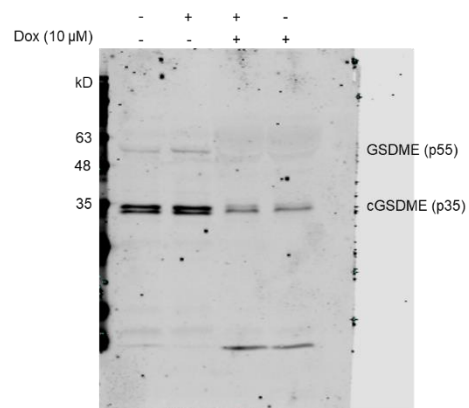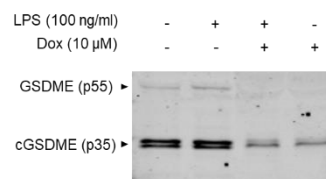

## 5. Caspas-3

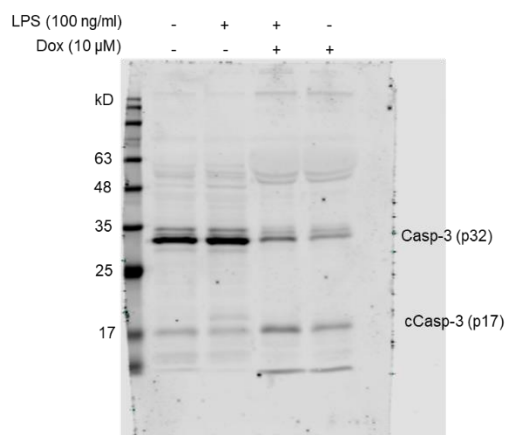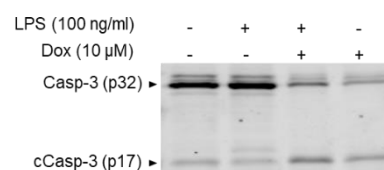

## 6. $\beta$ -actin

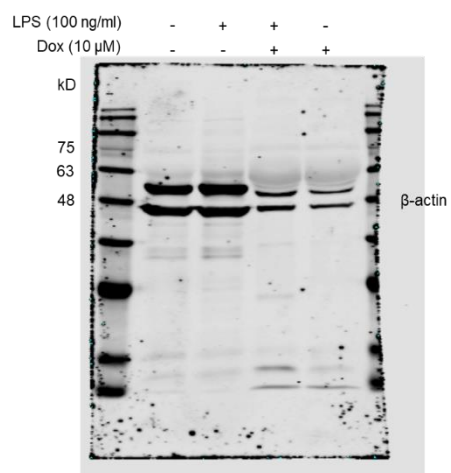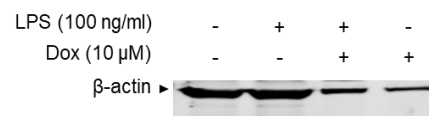

Supplement: fig5-data7 [file elife-92885-fig5-data7-v1.zip]
